# Supplementary material
Source: Springer Nature journal article supplement (https://www.springermedizin.de/resource/supplementary/12879_2011_2197_MOESM9_ESM.pdf/9443664)

## HIV Infected Infants

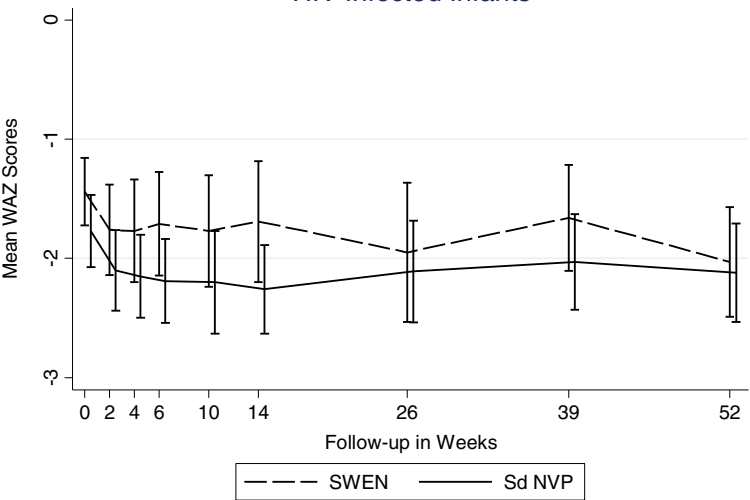

## HIV Uninfected Infants

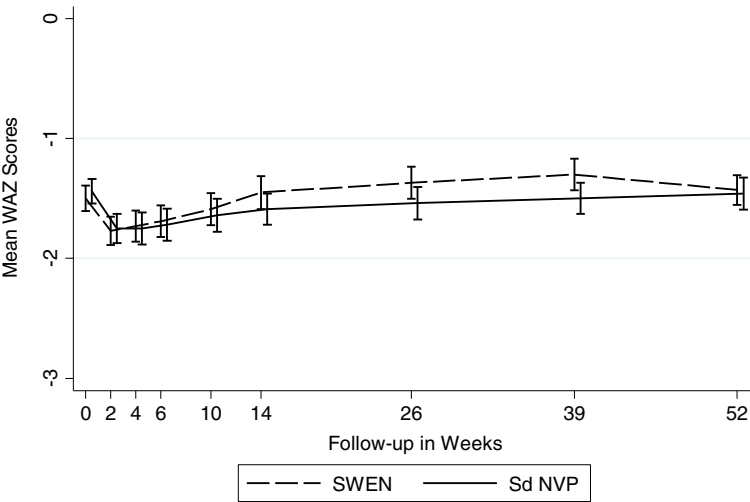

Supplement: MOESM9 [file 9443664]
